# Supplementary material for: Pyrene-sensitized electron transport across vesicle bilayers: dependence of transport efficiency on pyrene substituents
Source: Royal Society of Chemistry journal article supplement (doi:10.1039/b609507k), 2006-01-01
Supplement: b609507k.pdf [file b609507k.pdf]

## **Supporting Information**

## Preparation of sensitizers

**3-(1-Pyrenyl)propionic acid (1b).**<sup>1,2</sup> To a solution of 1-formylpyrene (461 mg, 2.0 mmol) in pyridine (1 mL, 12 mmol) was added malonic acid (1.04 g 10 mmol), and the solution was stirred for 9 h at 100 °C. After HCl (1.0 M, 3 mL) was added to cease the reaction, the reaction mixture was filtered to afford 3-(1-pyrenyl)acrylic acid (500 mg, 92%) as yellow granules. Hydrogenation of 3-(1-pyrenyl)acrylic acid (140 mg, 0.50 mmol) was performed by stirring under a H<sub>2</sub> atmosphere (1 atm) in acetic acid (50 mL) in the presence of PtO<sub>2</sub> (14 mg, 0.060 mmol) for 15 h at room temperature. After the removal of catalyst and solvent, the residue was dissolved in ether. The ethereal solution was washed with water, and dried over Na<sub>2</sub>SO<sub>4</sub>. The solvent was removed to give the crude product (120 mg, 87%), which was purified by recrystallization from hexane-CH<sub>2</sub>Cl<sub>2</sub> to give **1b** as light yellow granules: mp 183-185 °C (lit.<sup>1</sup> mp 180-181 °C); <sup>1</sup>H NMR (CDCl<sub>3</sub>) δ 2.93 (2H, t, *J* = 8.0 Hz), 3.72 (2H, t, *J* = 8.0 Hz), 7.92 (1H, d, *J* = 7.6 Hz), 8.00-8.04 (3H, m), 8.11-9.19 (4H, m), 8.28 (1H, d, *J* = 9.2 Hz); MS *m/z* (rel intensity) 274 (M<sup>+</sup>, 63), 215 (M<sup>+</sup> - C<sub>2</sub>H<sub>4</sub>CO<sub>2</sub>H, 100); UV-vis (CH<sub>3</sub>CN) λ<sub>max</sub> (log ε) 342 (4.45), 326 (4.41), 313 (4.04), 276 (4.58), 265 (4.36), 255 (4.04), 242 (4.69), 234 (4.58) nm.

**2-(1-Pyrenyl)ethylamine (2b).**<sup>3</sup> To a solution of (1-pyrenyl)ethanol (**3b**) (350 mg, 1.4 mmol) and Et<sub>3</sub>N (0.30 mL, 2.2 mmol) in CH<sub>2</sub>Cl<sub>2</sub> (3.3 mL) was added a CH<sub>2</sub>Cl<sub>2</sub> solution of methanesulfonyl chloride (1.0 M, 1.9 mL, 1.9 mmol) under a N<sub>2</sub> atmosphere at 0 °C. After stirring for 2 h at 0 °C, the reaction mixture was poured into ice-water, and extracted with CH<sub>2</sub>Cl<sub>2</sub>. The organic layer was dried over Na<sub>2</sub>SO<sub>4</sub>, and the solvent was removed to give the crude mesylate (434 mg, 94%) as yellow granules, which was purified by an alumina column chromatography with CH<sub>2</sub>Cl<sub>2</sub> eluent to give 2-(1-pyrenyl)ethyl mesylate as yellow granules: mp 102-104 °C. To convert the mesylate into the azide, a solution of the mesylate (130 mg,

0.40 mmol) and  $\text{NaN}_3$  (182 mg, 2.8 mmol) in DMF (5 mL) was stirred for 43 h at room temperature. After the solvent was evaporated, the residue was extracted with  $\text{CH}_2\text{Cl}_2$ , and the organic layer was washed with an aqueous solution of  $\text{NaHCO}_3$  and water, and dried over  $\text{Na}_2\text{SO}_4$ . The removal of the solvent afforded the crude 1-azido-2-(1-pyrenyl)ethane (65 mg, 60%), which was purified by recrystallization from hexane: mp 62-63 °C. The hydrogenation of the resulting azide was performed by stirring the azide (50 mg, 0.18 mmol) under a  $\text{H}_2$  atmosphere in THF (5 mL) in the presence of  $\text{PtO}_2$  (5.0 mg, 22  $\mu\text{mol}$ ) for 22 h at room temperature. After removal of the catalyst by filtration, the removal of the solvent afforded the crude product, which was purified by recrystallization to give **3b** as light yellow granules (8.3 mg, 18%): mp 77-79 °C;  $^1\text{H NMR}$  ( $\text{CDCl}_3$ )  $\delta$  3.22 (2H, t,  $J = 7.3$  Hz), 3.51 (2H, t,  $J = 7.3$  Hz), 7.09 (1H, d,  $J = 7.5$  Hz), 8.00 (1H, t,  $J = 7.5$  Hz), 8.02-8.06 (2H, m), 8.12 (1H, d,  $J = 9.0$  Hz), 8.13 (1H, d,  $J = 7.5$  Hz), 8.17 (1H, d,  $J = 8.0$  Hz), 8.17 (1H, d,  $J = 7.5$  Hz), 8.31 (1H, d,  $J = 9.0$  Hz); UV-vis ( $\text{CH}_3\text{CN}$ )  $\lambda_{\text{max}}$  (log  $\epsilon$ ) 343 (4.52), 327 (4.36), 313 (3.99), 276 (4.53), 266(4.30), 256 (3.97), 243 (4.63), 234 (4.63) nm.

**2-(1-Pyrenyl)ethanol (3b).**<sup>4,5</sup> To a suspension of  $\text{LiAlH}_4$  (227 mg, 6.0 mmol) in THF (5 mL) was added a solution of (1-pyrenyl)acetic acid (**1a**) (390 mg, 1.5 mmol) in THF (5 mL) under a  $\text{N}_2$  atmosphere. After stirring for 3 h at room temperature, the reaction mixture was quenched by the addition of methanol and 10% sulfuric acid. The organic material was extracted with ether, and the ethereal solution was washed with water, and dried over  $\text{Na}_2\text{SO}_4$ . The solvent was removed to give the crude product (350 mg, 95%), which was purified by a silica gel column chromatography with  $\text{CH}_2\text{Cl}_2$  eluent to give **2b** as yellow granules: mp 105-106 °C;  $^1\text{H NMR}$  ( $\text{CDCl}_3$ )  $\delta$  1.49 (1H, brs), 3.63 (2H, t,  $J = 6.5$  Hz), 4.12 (2H, q,  $J = 5.4$  Hz), 7.91 (1H, d,  $J = 7.8$  Hz), 7.97-8.19 (m, 7H); UV-vis ( $\text{CH}_3\text{CN}$ )  $\lambda_{\text{max}}$  (log  $\epsilon$ ) 342 (4.57), 326 (4.41), 313 (4.04), 276 (4.56), 265 (4.36), 255 (4.00), 242 (4.64), 234 (4.58) nm.

**1-Ethylpyrene (4a).**<sup>6,7</sup> A mixture of 1-acetylpyrene (500 mg, 2.0 mmol), hydrazine monohydrate (5 mL), and sodium hydroxide (4.0 g) in ethylene glycol (70 mL) was refluxed with stirring for 5 h. To the reaction mixture was added water, and the organic material was extracted with CH<sub>2</sub>Cl<sub>2</sub>. The organic layer was washed with water, and dried over Na<sub>2</sub>SO<sub>4</sub>. The solvent was removed to give the crude product, which was purified by recrystallization from ethanol to give **4a** (330 mg, 70%) as light yellow granules: mp 95-96 °C (lit.<sup>6</sup> mp 94-95 °C); <sup>1</sup>H NMR (CDCl<sub>3</sub>) δ 1.49 (3H, t, *J* = 7.5 Hz), 3.39 (2H, q, *J* = 7.5 Hz), 7.90 (1H, d, *J* = 7.5 Hz), 7.97-8.05, (3H, m), 8.10-8.17 (4H, m), 8.30 (1H, d, *J* = 9.0 Hz); MS *m/z* (rel. intensity) 230 (M<sup>+</sup>, 80), 215 (M<sup>+</sup> – CH<sub>3</sub>, 100).

**1-Octylpyrene (4b).**<sup>8</sup> To a mixture of pyrene (650 mg, 3.2 mmol) and AlCl<sub>3</sub> (900 mg, 6.7 mmol) in CS<sub>2</sub> (15 mL) was added a solution of octanoyl chloride, which was prepared by the reaction of octanoic acid (0.50 mL, 3.2 mmol) with thionyl chloride (20 mL), in CS<sub>2</sub> (15 mL) with stirring at 0 °C, and the mixture was stirred overnight at room temperature. To the reaction mixture was added ice and chilled 5% HCl, and the organic material was extracted with CH<sub>2</sub>Cl<sub>2</sub>. The organic layer was dried over Na<sub>2</sub>SO<sub>4</sub>, and the solvent was removed to give the crude 1-octanoylpyrene, which was separated from the unreacted starting material by silica gel column chromatography with hexane-CH<sub>2</sub>Cl<sub>2</sub> (3 : 1) eluent to give the pure 1-octanoylpyrene (700 mg, 64%). The Wolff-Kishner reduction of the ketone (110 mg, 0.32 mmol) was achieved in the same manner as that described for **4a** using hydrazine monohydrate (1 mL), sodium hydroxide (0.9 g), and ethylene glycol (20 mL). The crude product was purified by silica gel column chromatography with hexane-CH<sub>2</sub>Cl<sub>2</sub> (20 : 1) eluent to give **4b** (80 mg, 78%) as colorless granules: mp 60-61 °C; <sup>1</sup>H NMR (CDCl<sub>3</sub>) δ 0.88 (3H, t, *J* = 7.0 Hz), 1.25-1.32 (8H, m), 1.46-1.52 (2H, m), 1.82-1.88 (2H, m), 3.34 (2H, t, *J* = 8.0 Hz), 7.87 (1H, d, *J* = 8.0 Hz), 7.97-8.04, (3H, m), 8.09-8.17 (4H, m), 8.29 (1H, d, *J* = 9.0 Hz); MS

$m/z$  (rel. intensity) 314 ( $M^+$ , 55), 215 ( $M^+ - C_7H_{15}$ , 100).

**3-[6-(1-propyl)-1-pyrenyl]propionic acid (5a).** A solution of 1,6-dibromopyrene<sup>9</sup> (900 mg, 2.5 mmol),  $Pd(Ph_3P)_2Cl_2$  (23 mg, 32  $\mu$ mol), and CuI (3.1 mg, 16  $\mu$ mol) in morpholine (15 mL) was stirred for 10 min at 0 °C, and to the solution was added a solution of 1-[3-(tetrahydropyran-2-yloxy)]propyne (880 mg, 6.3 mmol) in morpholine (3 mL), and the reaction mixture was stirred overnight at 100 °C. After removal of the solvent under reduced pressure, the residue was extracted with  $CH_2Cl_2$ , and the organic layer was washed with water and dried over  $Na_2SO_4$ . The solvent was evaporated and the residue was developed on a silica gel column chromatography as  $CH_2Cl_2$  eluent to afford the crude product, which was purified by recrystallization from ethanol to give 1,6-bis[3-(tetrahydropyran-2-yloxy)propyn-1-yl]pyrene (**6**) (59 mg, 19%) as yellow granules: mp 131-134 °C;  $^1H$  NMR ( $CDCl_3$ )  $\delta$  1.53-1.91 (12H, m), 3.60-3.68 (2H, m), 3.99-4.03 (2H, m), 4.70 (2H, d,  $J = 16.0$  Hz), 4.77 (2H, d,  $J = 16.0$  Hz), 5.06 (2H, t,  $J = 3.1$  Hz), 8.10-8.13 (6H, m), 8.58 (2H, d,  $J = 16.0$  Hz); MS  $m/z$  (rel. intensity) 478 ( $M^+$ , 57), 394 ( $M^+ - C_5H_9O$ , 22), 377 ( $M^+ - C_5H_9O_2$ , 30), 292 ( $M^+ - C_5H_9O - C_5H_9O_2$ , 40), 276 ( $M^+ - C_5H_9O_2 - C_5H_9O_2$ , 100). The pyrene **6** was dissolved in  $CH_2Cl_2$  (0.8 mL) and ethanol (0.8 mL). To the solution was added pyridinium *p*-toluenesulfonate (5.0 mg, 20  $\mu$ mol), and the reaction mixture was stirred for 6 h at 60 °C. The precipitate was filtered, and washed with  $CH_2Cl_2$  to afford 1,6-bis(3-hydroxypropyn-1-yl)pyrene (**7**) as yellow granules (37 mg, 91%). The hydrogenation of **7** (78 mg, 0.25 mmol) was performed by stirring under a  $H_2$  atmosphere in THF (11.5 mL) in the presence of  $PtO_2$  (8.6 mg, 38  $\mu$ mol) for 20 h at room temperature. After removal of the catalyst by filtration, the solvent was evaporated to afford the crude product, which was purified by recrystallization from hexane- $CH_2Cl_2$  to give 1,6-bis(3-hydroxy-1-propyl)pyrene (**8**) as light yellow granules (80 mg, 100%): mp 178-181 °C. To a solution of **8** (21 mg, 66  $\mu$ mol) in  $CH_2Cl_2$  (10 mL) was added

Et<sub>3</sub>N (13  $\mu$ L, 94  $\mu$ mol) and methanesulfonyl chloride (4.9  $\mu$ L, 63  $\mu$ mol) at 0  $^{\circ}$ C. The reaction mixture was stirred for 2 h at 0  $^{\circ}$ C, and water was added to the reaction mixture. The organic material was extracted with CH<sub>2</sub>Cl<sub>2</sub>, and the organic layer was washed with water, and dried over Na<sub>2</sub>SO<sub>4</sub>. The solvent was evaporated to give a mixture of **8** and its mesylate (1 : 0.7). The mixture was dissolved in THF (1 mL), and to the solution was added a THF solution of LiBHET<sub>3</sub> (1.0 M, 0.4 mL, 0.4 mmol). The reaction mixture was stirred for 20 min at 0  $^{\circ}$ C, and water was added to cease the reaction. The organic material was extracted with ether, and the ethereal solution was washed with water and dried over Na<sub>2</sub>SO<sub>4</sub>. The solvent was evaporated, and the residue was developed on PTLC (CH<sub>2</sub>Cl<sub>2</sub> : ether = 5 : 1) to give 3-[6-(1-propyl)-1-pyrenyl]propan-1-ol (**9**) as light yellow granules (11 mg, 67%), which was purified by recrystallization from hexane-CH<sub>2</sub>Cl<sub>2</sub>: mp 133-137  $^{\circ}$ C; <sup>1</sup>H NMR (CDCl<sub>3</sub>)  $\delta$  1.08 (3H, t,  $J$  = 7.3 Hz), 1.85-1.93 (2H, m), 2.13 (2H, quin,  $J$  = 7.0 Hz), 3.31 (2H, t,  $J$  = 8.0 Hz), 3.45 (2H, t,  $J$  = 7.5 Hz), 3.79 (2H, t,  $J$  = 6.3 Hz), 7.86 (1H, d,  $J$  = 7.5 Hz), 7.87 (1H, d,  $J$  = 7.5 Hz), 8.05 (1H, d,  $J$  = 9.5 Hz), 8.06 (1H, d,  $J$  = 9.0 Hz), 8.09 (2H, d,  $J$  = 8.0 Hz), 8.23 (1H, d,  $J$  = 9.5 Hz), 8.24 (1H, d,  $J$  = 9.0 Hz); MS  $m/z$  (rel. intensity) 302 (M<sup>+</sup>, 100), 273 (M<sup>+</sup> - C<sub>2</sub>H<sub>5</sub>, 72), 257 (M<sup>+</sup> - C<sub>2</sub>H<sub>4</sub>OH, 49), 228 (M<sup>+</sup> - C<sub>2</sub>H<sub>5</sub> - C<sub>2</sub>H<sub>4</sub>OH, 93). Finally, to a solution of pyridinium dichromate (135 mg, 0.36 mmol) in DMF (0.3 mL) was added to a solution of **9** (18 mg, 60  $\mu$ mol) in DMF (1.2 mL). The reaction mixture was stirred for 10 h at room temperature. After addition of water to cease the reaction, the reaction mixture was extracted with ether. The aqueous layer was acidified with 5% sulfuric acid, and extracted with ether again. The combined ethereal solution was washed with water, and dried over Na<sub>2</sub>SO<sub>4</sub>. The solvent was evaporated to afford the crude product, which was purified by recrystallization from hexane-CH<sub>2</sub>Cl<sub>2</sub> to give **5a** as brown granules (4.7 mg, 25%): mp 193-195  $^{\circ}$ C; <sup>1</sup>H NMR (CDCl<sub>3</sub>)  $\delta$  1.08 (3H, t,  $J$  = 7.3 Hz), 1.87-1.92 (2H, m), 2.92 (2H, t,  $J$  = 8.0 Hz), 3.32 (2H, t,  $J$  = 7.5 Hz), 3.71

(2H, t,  $J = 8.0$  Hz), 7.87 (1H, d,  $J = 8.0$  Hz), 7.90 (1H, d,  $J = 7.5$  Hz), 8.06 (1H, d,  $J = 9.0$  Hz), 8.08-8.12 (3H, m), 8.20 (1H, d,  $J = 9.5$  Hz), 8.25 (1H, d,  $J = 9.0$  Hz); MS  $m/z$  (rel. intensity) 316 ( $M^+$ , 100), 287 ( $M^+ - C_2H_5$ , 77), 257 ( $M^+ - CH_2CO_2H$ , 40), 228 ( $M^+ - C_2H_5 - CH_2CO_2H$ , 67); UV-vis ( $CH_2Cl_2$ )  $\lambda_{max}$  (log  $\epsilon$ ) 380 (3.43), 351 (4.61), 335 (4.43), 320 (4.04), 281 (4.66), 270 (4.38), 259 (4.04), 247 (4.76), 238 (4.58) 226 (4.49) nm; HRMS (FAB)  $m/z$  339.1344 ( $MNa^+$ ,  $C_{22}H_{20}O_2Na$  requires 339.1361).

**3-[6-(1-octyl)-1-pyrenyl]propionic acid (5b).** A solution of 1,6-dibromopyrene<sup>9</sup> (860 mg, 2.4 mmol),  $Pd(Ph_3P)_2Cl_2$  (22 mg, 32  $\mu$ mol), and CuI (3.1 mg, 15  $\mu$ mol) in morpholine (15 mL) was stirred for 10 min at 0 °C, and to the solution added a solution of 1-octyne (0.42 mL, 2.8 mmol) in morpholine (5 mL). The reaction mixture was stirred for 21 h at 100 °C. After removal of solvent under reduced pressure, water was added to the reaction mixture and the organic material was extracted with  $CH_2Cl_2$ . The organic layer was dried over  $Na_2SO_4$ , and the solvent was evaporated to afford the crude product. Purification by a silica gel column chromatography with hexane eluent gave 1-bromo-6-(1-octynyl)pyrene (**10b**) as yellow viscous oil (114 mg, 26%). The coupling of **10b** (102 mg, 0.26 mmol) with 1-(3-tetrahydropyran-2-yloxy)propyne (222 mg, 1.6 mmol) was performed in the presence of  $Pd(Ph_3P)_2Cl_2$  (22 mg, 32  $\mu$ mol) and CuI (3.1 mg, 15  $\mu$ mol) in morpholine (8 mL) in the same procedure as described in the synthesis of **10b**. Purification by a silica gel column chromatography with hexane- $CH_2Cl_2$  (2 : 1) eluent gave 1-(1-octynyl)-6-[3-(tetrahydropyran-2-yloxy)-1-propynyl]pyrene (**11b**) as yellow granules (40 mg, 43%): mp 136-139 °C;  $^1H$  NMR ( $CDCl_3$ )  $\delta$  0.94 (3H, t,  $J = 6.5$  Hz), 1.37-1.42 (4H, m), 1.57-1.67 (4H, m), 1.73-1.91 (6H, m), 2.64 (2H, t,  $J = 7.0$  Hz), 3.61-3.65 (1H, m), 3.95-4.00 (1H, m), 4.71 (1H, d,  $J = 15.5$  Hz), 5.06 (1H, t,  $J = 3.5$  Hz), 8.05-8.11 (6H, m), 8.52 (1H, d,  $J = 9.0$  Hz), 8.55 (1H, d,  $J = 9.0$  Hz); MS  $m/z$  (rel. intensity) 448 ( $M^+$ , 7), 364 ( $M^+ - C_5H_9O$ , 5), 347 ( $M^+ - C_5H_9O_2$ , 5), 340 ( $M^+ -$

$C_8H_{13}$ , 21), 239 ( $M^+ - C_5H_9O_2 - C_8H_{13}$ , 100). The pyrene **11b** (66 mg, 0.15 mmol) was dissolved in  $CH_2Cl_2$  (0.4 mL) and ethanol (0.8 mL), and pyridinium *p*-toluenesulfonate (1.3 mg, 5.3  $\mu$ mol) was added to the solution. The reaction mixture was stirred for 18 h at 60 °C. After removal of the solvent, the residue was developed on PTLC (hexane- $CH_2Cl_2$  = 1 : 3) and purified by recrystallization from hexane- $CH_2Cl_2$  to give 3-[6-(1-octynyl)-1-pyrenyl]prop-2-yn-1-ol (**12b**) as light yellow granules (42 mg, 78%): mp 137-141 °C;  $^1H$  NMR ( $CDCl_3$ )  $\delta$  0.95 (3H, t,  $J$  = 6.5 Hz), 1.39-1.43 (4H, m), 1.56-1.60 (2H, m), 1.78 (2H, quint,  $J$  = 7.5 Hz), 1.85 (1H, t,  $J$  = 6.0 Hz), 2.66 (2H, t,  $J$  = 7.0 Hz), 4.74 (2H, d,  $J$  = 6.0 Hz), 8.08-8.13 (6H, m), 8.53 (1H, d,  $J$  = 9.0 Hz), 8.59 (1H, d,  $J$  = 9.0 Hz). The hydrogenation of **12b** (37 mg, 0.10 mmol) was performed by stirring under a  $H_2$  atmosphere in THF (5 mL) in the presence of  $PtO_2$  (2.9 mg, 13  $\mu$ mol) for 18 h at room temperature. After removal of the catalyst by filtration, the solvent was evaporated to give the crude product (39 mg, 100%). Purification by recrystallization from hexane- $CH_2Cl_2$  gave 3-[6-(1-octyl)-1-pyrenyl]propan-1-ol (**13b**) as light brown granules: mp 120-124 °C;  $^1H$  NMR ( $CDCl_3$ )  $\delta$  0.88 (3H, t,  $J$  = 6.3 Hz), 1.25-1.32 (6H, m), 1.37 (2H, quin,  $J$  = 7.5 Hz), 1.48 (2H, quin,  $J$  = 7.7 Hz), 1.84 (2H, quin,  $J$  = 7.7 Hz), 2.13 (2H, m), 3.32 (2H, t,  $J$  = 8.0 Hz), 3.45 (2H, t,  $J$  = 7.8 Hz), 3.79 (2H, t,  $J$  = 6.0 Hz), 7.85-7.88 (2H, m), 8.04-8.10 (4H, m), 8.23 (1H, d,  $J$  = 9.5 Hz), 8.24 (1H, d,  $J$  = 8.5 Hz). To a solution of pyridinium dichromate (184 mg, 0.49 mmol) in DMF (0.3 mL) was added a solution of **13b** (30 mg, 81  $\mu$ mol) in DMF (1.7 mL). The reaction mixture was stirred for 14 h at room temperature. After water was added to cease the reaction, the organic material was extracted with ether, and the ethereal solution was dried over  $Na_2SO_4$ . After evaporation of the solvent, the residue was stirred in a mixture of 5% sulfuric acid (3 mL) and ether (4 mL) for 15 min. The aqueous layer was extracted with ether, and the combined ethereal solution was washed with water, and dried over  $Na_2SO_4$ . After evaporation of the solvent, the residue



was purified by recrystallization from hexane-CH<sub>2</sub>Cl<sub>2</sub> to give **5b** as light brown granules (7.7 mg, 25%): mp 169-172 °C, <sup>1</sup>H NMR (CDCl<sub>3</sub>) δ 0.87 (3H, t, *J* = 7.0 Hz), 1.27-1.31 (6H, m), 1.34-1.40 (2H, m), 1.45-1.51 (2H, m), 1.84 (2H, quin, *J* = 7.7 Hz), 2.92 (2H, t, *J* = 8.1 Hz), 3.33 (2H, t, *J* = 7.8 Hz), 3.70 (2H, t, *J* = 8.0 Hz), 7.86 (1H, d, *J* = 7.8 Hz), 7.89 (1H, d, *J* = 7.8 Hz), 8.05 (1H, d, *J* = 9.2 Hz), 8.08-8.11 (3H, m), 8.20 (1H, d, *J* = 9.4 Hz), 8.24 (1H, d, *J* = 9.4 Hz); <sup>13</sup>C NMR (CDCl<sub>3</sub>) δ 14.1, 22.7, 28.5, 29.3, 29.6, 29.9, 31.9, 32.0, 33.8, 35.4, 121.8, 123.1, 124.6, 1245.8, 125.4, 125.5, 126.9, 127.1, 127.4, 127.9, 128.8, 128.9, 129.4, 130.1, 133.8, 137.5, 176.7; MS *m/z* (rel. intensity) 386 (M<sup>+</sup>, 100), 287 (M<sup>+</sup> - C<sub>7</sub>H<sub>15</sub>, 70), 228 (M<sup>+</sup> - C<sub>7</sub>H<sub>15</sub> - CH<sub>2</sub>CO<sub>2</sub>H, 61); UV-vis (CH<sub>2</sub>Cl<sub>2</sub>) λ<sub>max</sub> (log ε) 380 (3.34), 352 (4.59), 335 (4.46), 320 (4.08), 280 (4.54), 270 (4.40), 260 (4.08), 245 (4.60), 238 (4.60); HRMS (FAB) *m/z* 387.2300 (MH<sup>+</sup>, C<sub>27</sub>H<sub>31</sub>O<sub>2</sub> requires 387.2324).

**3-[6-(1-dodecyl)-1-pyrenyl]propionic acid (5c)**. This acid was synthesized in the same manner as that described for **5b** using 1-dodecyne as a starting material. The coupling of 1,6-dibromopyrene<sup>9</sup> (580 mg, 1.6 mmol) with 1-dodecyne (0.41 mL, 1.9 mmol) in the presence of Pd(Ph<sub>3</sub>P)<sub>2</sub>Cl<sub>2</sub> (27 mg, 39 μmol) and CuI (3.0 mg, 15 μmol) in morpholine (20 mL), followed by the subsequent coupling of the resulting 1-bromo-6-(1-dodecynyl)pyrene (**10c**) (187 mg, 0.42 mmol) with 1-[3-(tetrahydropyran-2-yloxy)]propyne (355 mg, 2.5 mmol) in the presence of Pd(Ph<sub>3</sub>P)<sub>2</sub>Cl<sub>2</sub> (22 mg, 32 μmol) and CuI (3.1 mg, 15 μmol) in morpholine (10 mL), gave 1-(1-dodecynyl)-6-[3-(tetrahydropyran-2-yloxy)-1-propynyl]pyrene (**11c**) as light brown viscous oil (71 mg, 9% in two steps): <sup>1</sup>H NMR (CDCl<sub>3</sub>) δ 0.88 (3H, t, *J* = 6.8 Hz), 1.28-1.80 (22H, m), 2.66 (2H, t, *J* = 6.8 Hz), 3.62-3.68 (1H, m), 3.95-4.03 (1H, m), 4.70 (1H, d, *J* = 15.8 Hz), 4.77 (1H, d, *J* = 15.8 Hz), 5.06-5.09 (1H, m), 8.08-8.12 (6H, m), 8.55 (1H, d, *J* = 8.9 Hz), 8.59 (1H, d, *J* = 8.9 Hz). The deprotection of **11c** (91 mg, 0.18 mmol) was achieved by stirring with pyridinium *p*-toluenesulfonate (1.6 mg, 6.4 μmol) in a binary solvent of

CH<sub>2</sub>Cl<sub>2</sub> and ethanol to give 3-[6-(1-dodecynyl)-1-pyrenyl]prop-2-yn-1-ol (**12c**) as yellow granules (70 mg, 92%). The hydrogenation of **12c** (30 mg, 71 μmol) was performed by stirring under a H<sub>2</sub> atmosphere in THF (5 mL) in the presence of PtO<sub>2</sub> (3.0 mg, 13 μmol) for 19 h at room temperature to give 3-[6-(1-dodecyl)-1-pyrenyl]propan-1-ol (**13c**) as light yellow granules (24 mg, 78%). The alcohol **13c** (18 mg, 43 μmol) was oxidized with pyridinium dichromate (68 mg, 0.18 mmol) in DMF (1.2 mL) to afford **5c** as light brown granules (4.1 mg, 22%): mp 171-175 °C; <sup>1</sup>H NMR (CDCl<sub>3</sub>) δ 0.88 (3H, t, *J* = 6.9 Hz), 0.99-1.34 (14H, m), 1.36-1.39 (2H, m), 1.48 (2H, quin, *J* = 7.6 Hz), 1.85 (2H, quin, *J* = 7.5 Hz), 2.93 (2H, t, *J* = 8.0 Hz), 3.34 (2H, t, *J* = 7.8 Hz), 3.71 (2H, t, *J* = 7.9 Hz), 7.87 (1H, d, *J* = 8.0 Hz), 7.90 (1H, d, *J* = 8.0 Hz), 8.06 (1H, d, *J* = 9.2 Hz), 8.09-8.12 (3H, m), 8.21 (1H, d, *J* = 8.9 Hz), 8.25 (1H, d, *J* = 9.2 Hz); <sup>13</sup>C NMR (CDCl<sub>3</sub>) δ 14.1, 22.7, 28.6, 29.4, 29.6, 29.7, 29.9, 31.9, 32.0, 33.8, 35.2, 121.8, 123.1, 124.6, 124.8, 125.4, 125.5, 126.9, 127.1, 127.4, 127.9, 128.8, 128.9, 129.4, 130.1, 133.8, 137.5, 175.8; MS *m/z* (rel. intensity) 442 (M<sup>+</sup>, 100), 287 (M<sup>+</sup> - C<sub>11</sub>H<sub>23</sub>, 82), 227 (M<sup>+</sup> - C<sub>11</sub>H<sub>23</sub> - CH<sub>2</sub>CO<sub>2</sub>H, 71); UV-vis (CH<sub>2</sub>Cl<sub>2</sub>) λ<sub>max</sub> (log ε) 380 (3.43), 352 (4.56), 335 (4.40), 321 (4.04), 281 (4.56), 270 (4.34), 259 (4.04), 246 (4.64), 238 (4.57) nm; HRMS (FAB) *m/z* 443.2923 (MH<sup>+</sup>, C<sub>31</sub>H<sub>39</sub>O<sub>2</sub> requires 443.2950).

## References

- (1) K. W. Bair, R. L. Tuttle, V. C. Knick, M. Cory and D. D. McKee, *J. Med. Chem.*, 1990, **33**, 2385.
- (2) W. E. Bachmann and M. Carmack, *J. Am. Chem. Soc.*, 1941, **63**, 2494.
- (3) T. J. Dale and J. Rebek, Jr., *J. Am. Chem. Soc.*, 2006, **128**, 4500.
- (4) H.-C. Becker and B. Nordén, *J. Am. Chem. Soc.*, 1999, **121**, 11947.
- (5) M. A. Cichy, D. L. Stegmeier, H. Veening and H.-D. Becker, *J. Chromatogr.*, 1993, **613**,

15.

- (6) P. Babu, N. M. Sangeetha, P. Vijaykumar, U. Maitra, K. Rissanen and A. R. Raju, *Chem. Eur. J.*, 2003, **9**, 1922.
- (7) K. Kano, H. Matsumoto, Y. Yoshimura and S. Hashimoto, *J. Am. Chem. Soc.*, 1998, **110**, 204.
- (8) P. Reynders, W. Kühnle and K. A. Zachariasse, *J. Am. Chem. Soc.*, 1990, **112**, 3929.
- (9) J. Grimshaw and J. T. Grinshaw, *J. Chem. Soc., Perkin Trans 1*, 1972, 1622.

### Derivation of Eq. 3 from Eq. 2

According to Scheme 1, the changes in the concentration of reactive intermediates involved in the  $MV^{+}$  formation, that is,  $S_i^*$ ,  $S_i^{-}$ , and  $S_o^{-}$ , are described by the following Equations (S1)-(S3).

$$d[S_i^*]/dt = \alpha I - \tau_s^{-1}[S_i^*] - k_q[S_i^*][Asc^-] \quad (S1)$$

$$d[S_i^{-}]/dt = k_q[S_i^*][Asc^-] - \tau_i^{-1}[S_i^{-}] - k_e[S_i^{-}][S_o] \quad (S2)$$

$$d[S_o^{-}]/dt = k_e[S_i^{-}][S_o] - \tau_o^{-1}[S_o^{-}] - k_t[S_o^{-}][MV^{2+}] \quad (S3)$$

The rate constants and lifetimes are defined in the text. Since these species are so reactive that their concentrations are considerably low, it can be assumed that their concentrations remain constant (a steady-state approximation). Thus, from Equations (S4)-(S6),

$$d[S_i^*]/dt = 0 \quad (S4)$$

$$d[S_i^{-}]/dt = 0 \quad (S5)$$

$$d[S_o^{-}]/dt = 0 \quad (S6)$$

the concentrations of these species are described by the following Equations (S7)-(S9).

$$[S_i^*] = \alpha I / (\tau_s^{-1} + k_q[Asc^-]) \quad (S7)$$

$$[S_i^{-}] = k_q[S_i^*][Asc^-] / (\tau_i^{-1} + k_e[S_o]) \quad (S8)$$

$$[S_o^{-}] = k_e[S_i^{-}][S_o] / (\tau_o^{-1} + k_t[MV^{2+}]) \quad (S9)$$

According to Scheme 1, the change in  $[MV^{+}]$  is described by Eq. 2.

$$d[MV^{+\cdot}]/dt = k_i[S_o^{-\cdot}][MV^{2+}] - k_r[MV^{+\cdot}] \quad (2)$$

Applying Equations (S7)-(S9) to (2), Equation (S10) is obtained.

$$\frac{d[MV^{+\cdot}]}{dt} = \frac{k_t[MV^{2+}]}{\tau_o^{-1} + k_t[MV^{2+}]} \frac{k_e[S_o]}{\tau_i^{-1} + k_e[S_o]} \frac{\alpha I k_q[Asc^-]}{\tau_s^{-1} + k_q[Asc^-]} - k_r[MV^{+\cdot}] \quad (S10)$$

The term  $k_q[Asc^-]/(\tau_s^{-1} + k_q[Asc^-])$  indicates that the proportion of the rate of the process effective for the electron transport, that is, quenching of the sensitizer excited state by  $Asc^-$ , to the total rate of the decay process of the sensitizer excited state. Therefore, this term can be described in terms of the quenching efficiency  $\Phi_D$ . Similarly, the term  $\Phi_E = k_e[S_o]/(\tau_i^{-1} + k_e[S_o])$  shows the efficiency for  $S_i^{-\cdot}$  to transfer an electron to  $S_o$ , and the term  $\Phi_A = k_t[MV^{2+}]/(\tau_o^{-1} + k_t[MV^{2+}])$  represents the efficiency for  $S_o^{-\cdot}$  to transfer an electron to  $MV^{+\cdot}$ . Using these relations, Equation (S10) is rewritten as (S11).

$$d[MV^{+\cdot}]/dt = \alpha I \Phi_D \Phi_E \Phi_A - k_r[MV^{+\cdot}] \quad (S11)$$

Since  $Asc^-$  and  $MV^{2+}$  are used in large excess, their concentrations can be considered to be constant at the early stage of the reaction. Thus, Equation (S11) is solved to give Eq. 3.

$$[MV^{+\cdot}] = (\alpha I \Phi_D \Phi_E \Phi_A / k_r)[1 - \exp(-k_r t)] \quad (3)$$

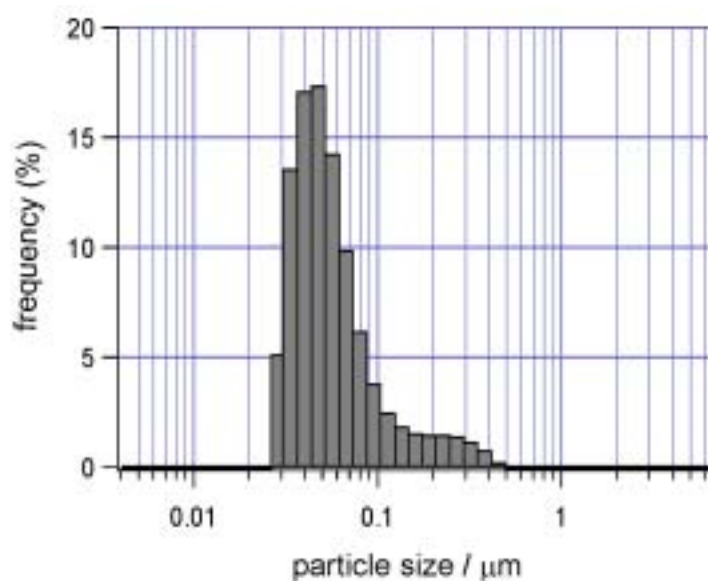

**Fig. S1** Particle size distribution of PC vesicles containing **1a**.

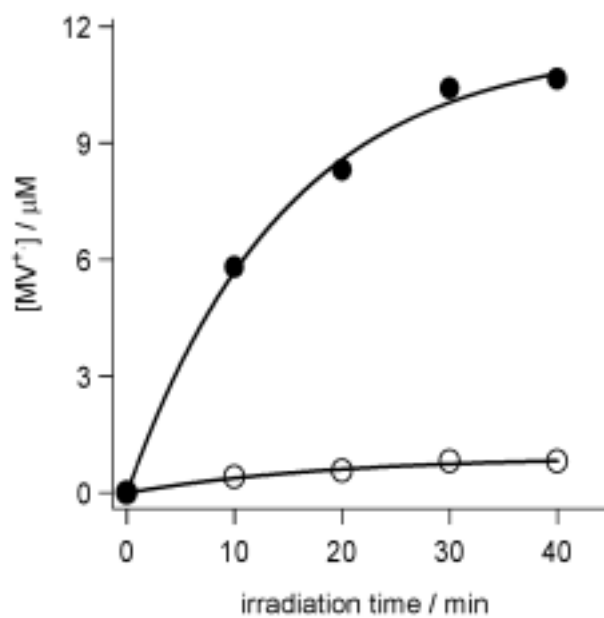

**Fig. S2** Change in the concentration of  $\text{MV}^{2+}$  produced by the irradiation of a solution of vesicles containing **1a** and  $\text{Asc}^-$  in the presence ( $\circ$ ) and the absence ( $\bullet$ ) of surfactant vs irradiation time.

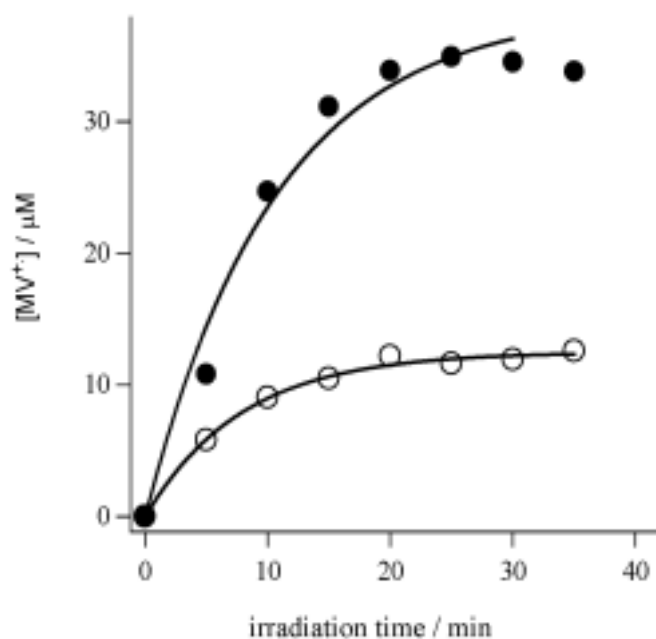

**Fig. S3** Change in the concentration of MV<sup>•+</sup> produced by the irradiation of a solution of vesicles containing **2a** in the presence (●) and the absence (○) of Asc<sup>-</sup> in the inner waterpool vs irradiation time.

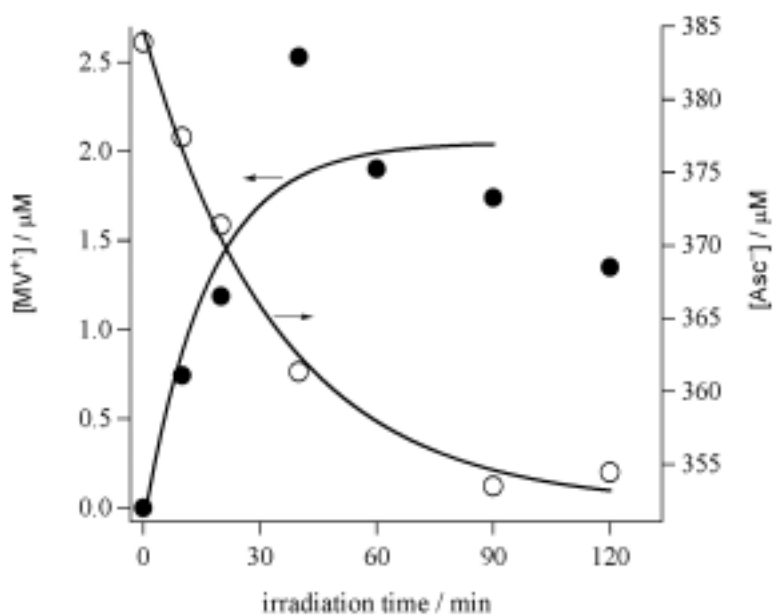

**Fig. S4** Change in the concentration of MV<sup>•+</sup> (●) produced and Asc<sup>-</sup> (○) consumed by the irradiation of a solution of vesicles containing **1a** vs irradiation time.

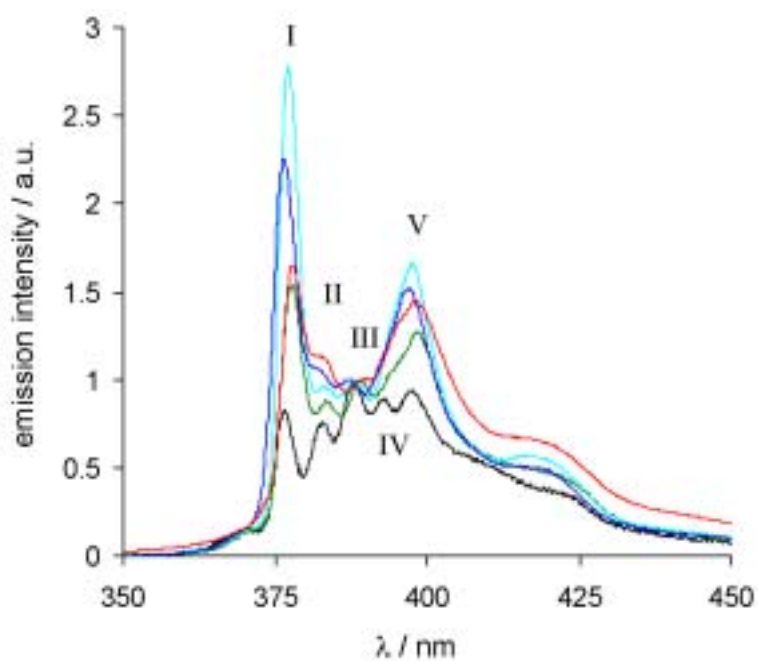

**Fig. S5** Fluorescence spectra of **1a** in cyclohexane (black), chloroform (green), ethanol (light blue), water (blue), and vesicle solution (red). The emission intensities are normalized at the band III.

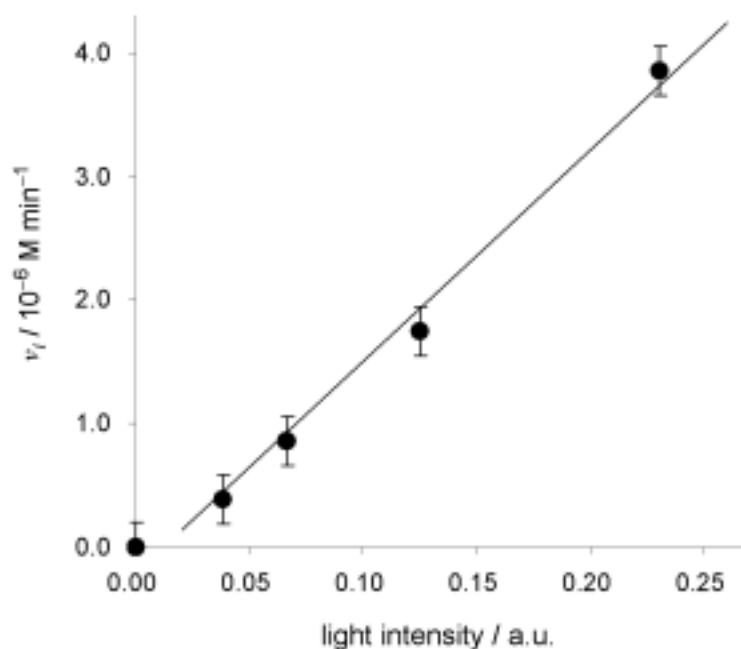

**Fig. S6** Dependence of the initial rate of  $\text{MV}^{+\bullet}$  formation on the incident light intensity for the irradiation (366 nm) of a solution of vesicles containing **1b** and  $\text{Asc}^-$ .



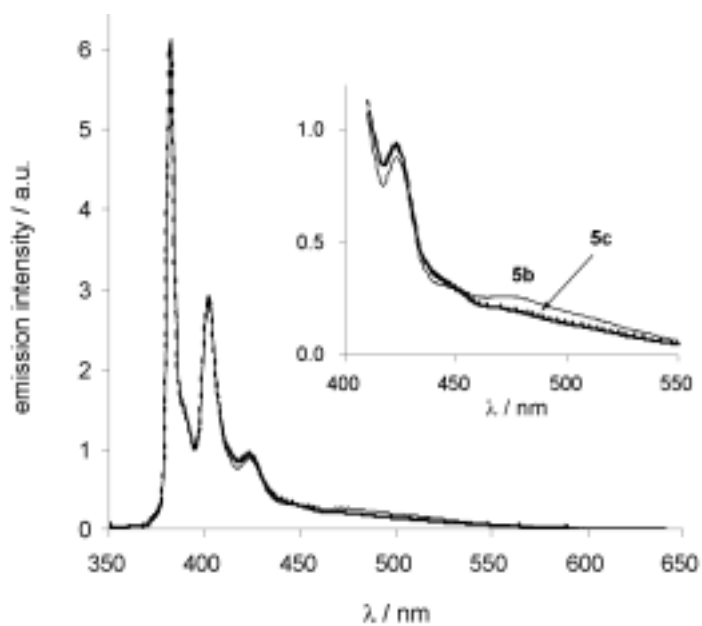

**Fig. S7** Fluorescence spectra of **5b** (solid line) and **5c** (broken line) recorded in the vesicle solution on excitation at 330 nm. The inset figure shows an enlarged spectra of the range in wavelength from 400 to 550 nm.
